# Supplementary material
Source: PubMed Central journal article supplement (PMC6194341)
Supplement: blood858597-suppl1.pdf [file blood858597-suppl1.pdf]

## SUPPLEMENTARY TABLES

|                                                                    | Polycythemia vera | Essential thrombocythemia | Myelofibrosis  | Myeloproliferative neoplasm NOS | Chronic myeloid leukemia | Myelodysplastic syndrome | Acute myeloid leukemia |
|--------------------------------------------------------------------|-------------------|---------------------------|----------------|---------------------------------|--------------------------|--------------------------|------------------------|
| <b>Number of patients</b>                                          | 6,649             | 3,287                     | 1,443          | 1,638                           | 5,567                    | 3,520                    | 12,832                 |
| <b>Male/female ratio</b>                                           | 0.97 (3279/3370)  | 0.73 (1385/1902)          | 1.24 (800/643) | 0.99 (815/823)                  | 1.26 (3109/2458)         | 1.35 (2021/1499)         | 1.09 (6689/6143)       |
| <b>Mean age at diagnosis</b>                                       | 67                | 65                        | 69             | 75                              | 59                       | 74                       | 62                     |
| <b>Lower quartile of the age of diagnosis distribution (years)</b> | 59                | 56                        | 63             | 68                              | 47                       | 68                       | 52                     |
| <b>Calendar year of diagnosis</b>                                  |                   |                           |                |                                 |                          |                          |                        |
| <b>1958-1967</b>                                                   | 864               | 0                         | 2              | 0                               | 1,114                    | 0                        | 915                    |
| <b>1968-1977</b>                                                   | 1,175             | 2                         | 162            | 0                               | 1,109                    | 0                        | 1,908                  |
| <b>1978-1987</b>                                                   | 1,294             | 158                       | 350            | 0                               | 1,005                    | 0                        | 2,534                  |
| <b>1988-1997</b>                                                   | 1,107             | 817                       | 210            | 300                             | 804                      | 594                      | 2,635                  |
| <b>1998-2007</b>                                                   | 1,121             | 1,020                     | 293            | 877                             | 825                      | 1,286                    | 2,650                  |
| <b>2007-2015</b>                                                   | 1,088             | 1,290                     | 426            | 461                             | 710                      | 1,640                    | 2,190                  |
| <b>Total</b>                                                       | 15,071            | 11,597                    | 3,871          | 5,579                           | 13,211                   | 11,145                   | 32,562                 |
| <b>Number of relatives</b>                                         |                   |                           |                |                                 |                          |                          |                        |
| <b>Parents</b>                                                     | 2,954             | 3,100                     | 835            | 1,332                           | 3,142                    | 2,513                    | 7,663                  |
| <b>Siblings</b>                                                    | 2,260             | 2,504                     | 680            | 1,116                           | 2,422                    | 1,965                    | 5,966                  |
| <b>Offspring</b>                                                   | 9,916             | 6,009                     | 2,358          | 3,131                           | 7,656                    | 6,685                    | 18,976                 |
| <b>Median follow-up of first-degree relatives (years)</b>          | 51                | 47                        | 50             | 49                              | 50                       | 50                       | 50                     |
| <b>Total person-years of first-degree relatives</b>                | 686,315           | 495,831                   | 172,440        | 246,730                         | 588,126                  | 497,299                  | 1,458,088              |

Supplementary Table 1: Characteristics of patients and first-degree relatives. NOS, not otherwise specified.

|                                    | Overall SIR (95% CI) | Age group | N   | SIR (95% CI)       | P value                |
|------------------------------------|----------------------|-----------|-----|--------------------|------------------------|
| <b>Myeloid malignancies</b>        | 1.99 (1.82-2.17)     | ≤56       | 167 | 2.19 (1.87-2.55)   | 0.13                   |
|                                    |                      | >56       | 312 | 1.89 (1.69-2.11)   |                        |
| <b>Myeloproliferative neoplasm</b> | 4.93 (4.26-5.70)     | ≤59       | 80  | 6.46 (5.12-8.04)   | 4.1 × 10 <sup>-3</sup> |
|                                    |                      | >59       | 101 | 4.15 (3.38-5.04)   |                        |
| <b>Polycythemia vera</b>           | 7.66 (5.86-10.03)    | ≤59       | 26  | 10.90 (7.12-15.97) | 0.03                   |
|                                    |                      | >59       | 27  | 5.96 (3.93-8.67)   |                        |
| <b>Essential thrombocythemia</b>   | 6.75 (4.44-10.25)    | ≤56       | 10  | 9.76 (4.68-17.95)  | 0.17                   |
|                                    |                      | >56       | 12  | 5.37 (2.77-9.38)   |                        |
| <b>Chronic myeloid leukemia</b>    | 0.78 (0.29-2.07)     | ≤47       | 2   | 1.33 (0.16-4.80)   | 0.39                   |
|                                    |                      | >47       | 2   | 0.55 (0.07-1.99)   |                        |
| <b>Myelodysplastic syndrome</b>    | 6.88 (4.33-10.92)    | ≤68       | 13  | 11.95 (6.36-20.43) | 8.8 × 10 <sup>-3</sup> |
|                                    |                      | >68       | 5   | 3.27 (1.06-7.63)   |                        |
| <b>Acute myeloid leukemia</b>      | 1.53 (1.15-2.04)     | ≤52       | 13  | 1.48 (0.79-2.53)   | 0.90                   |
|                                    |                      | >52       | 33  | 1.55 (1.07-2.18)   |                        |

**Supplementary Table 2: Familial relative risks of myeloid malignancies, by the age at diagnosis.** Age group defined by the lower quartile of the distribution of the diagnosis. FDR, first-degree relative; N, number; SIR, Standardised incidence ratios; CI, confidence interval. P value represents a trend test. The age stratification was based on the first quartile of the age at diagnosis distribution of all incident cases for each myeloid malignancy. Where a first-degree relative appears in both age groups due to being related to two or more incident cases, the first-degree relative is counted in the younger age group. Myeloid malignancies comprise polycythemia vera, essential thrombocythemia, myelofibrosis, myeloproliferative neoplasm NOS, chronic myeloid leukemia, myelodysplastic syndrome, acute myeloid leukemia. Myeloproliferative neoplasms comprise polycythemia vera, essential thrombocythemia, myelofibrosis and myeloproliferative neoplasm NOS.

|                                    | Overall SIR (95% CI) | Relationship | N   | SIR (95% CI)       | P value              |
|------------------------------------|----------------------|--------------|-----|--------------------|----------------------|
| <b>Myeloid malignancies</b>        | 1.99 (1.82-2.17)     | Parent-child | 393 | 1.98 (1.79-2.19)   | 0.75                 |
|                                    |                      | Sibling      | 90  | 2.06 (1.66-2.53)   |                      |
| <b>Myeloproliferative neoplasm</b> | 4.93 (4.26-5.70)     | Parent-child | 149 | 5.02 (4.25-5.89)   | 0.76                 |
|                                    |                      | Sibling      | 34  | 4.75 (3.29-6.64)   |                      |
| <b>Polycythemia vera</b>           | 7.66 (5.86-10.03)    | Parent-child | 53  | 8.84 (6.62-11.56)  | $1.0 \times 10^{-5}$ |
|                                    |                      | Sibling      | 0   |                    |                      |
| <b>Essential thrombocythemia</b>   | 6.75 (4.44-10.25)    | Parent-child | 16  | 6.73 (3.85-10.93)  | 0.99                 |
|                                    |                      | Sibling      | 6   | 6.77 (2.48-14.74)  |                      |
| <b>Chronic myeloid leukemia</b>    | 0.78 (0.29-2.07)     | Parent-child | 4   | 0.93 (0.25-2.38)   | 0.82                 |
|                                    |                      | Sibling      | 0   |                    |                      |
| <b>Myelodysplastic syndrome</b>    | 6.88 (4.33-10.92)    | Parent-child | 10  | 5.50 (2.64-10.11)  | 0.21                 |
|                                    |                      | Sibling      | 8   | 10.00 (4.32-19.70) |                      |
| <b>Acute myeloid leukemia</b>      | 1.53 (1.15-2.04)     | Parent-child | 30  | 1.19 (0.80-1.70)   | $2.1 \times 10^{-3}$ |
|                                    |                      | Sibling      | 16  | 3.29 (1.88-5.34)   |                      |

**Supplementary Table 3 - Standardised incident ratios of myeloid malignancies in first-degree relatives of individuals with myeloid malignancy, stratified by familial relationship.** N, number; SIR, standardised incident ratio; CI, confidence interval. *P* value represents a trend test. Where a first-degree relative appears in both relationship groups due to being related to two or more incident cases, the first-degree relative is counted in both relationship groups. Myeloid malignancies comprise polycythemia vera, essential thrombocythemia, myelofibrosis, myeloproliferative neoplasm NOS, chronic myeloid leukemia, myelodysplastic syndrome, acute myeloid leukemia. Myeloproliferative neoplasms comprise polycythemia vera, essential thrombocythemia, myelofibrosis and myeloproliferative neoplasm NOS.

|                                    | Overall SIR (95% CI) | Sex of case | N   | SIR (95% CI)      | P value |
|------------------------------------|----------------------|-------------|-----|-------------------|---------|
| <b>Myeloid malignancies</b>        | 1.99 (1.82-2.17)     | Male        | 246 | 1.94 (1.71-2.20)  | 0.42    |
|                                    |                      | Female      | 240 | 2.08 (1.83-2.36)  |         |
| <b>Myeloproliferative neoplasm</b> | 4.93 (4.26-5.70)     | Male        | 86  | 4.73 (3.78-5.84)  | 0.44    |
|                                    |                      | Female      | 99  | 5.30 (4.31-6.45)  |         |
| <b>Polycythemia vera</b>           | 7.66 (5.86-10.03)    | Male        | 29  | 7.98 (5.34-11.46) | 0.86    |
|                                    |                      | Female      | 25  | 7.60 (4.92-11.22) |         |
| <b>Essential thrombocythemia</b>   | 6.75 (4.44-10.25)    | Male        | 9   | 6.33 (2.89-12.02) | 0.80    |
|                                    |                      | Female      | 13  | 7.06 (3.76-12.07) |         |
| <b>Chronic myeloid leukemia</b>    | 0.78 (0.29-2.07)     | Male        | 1   | 0.34 (0.01-1.89)  | 0.20    |
|                                    |                      | Female      | 3   | 1.33 (0.27-3.89)  |         |
| <b>Myelodysplastic syndrome</b>    | 6.88 (4.33-10.92)    | Male        | 10  | 6.70 (3.21-12.32) | 0.90    |
|                                    |                      | Female      | 8   | 7.12 (3.07-14.03) |         |
| <b>Acute myeloid leukemia</b>      | 1.53 (1.15-2.04)     | Male        | 24  | 1.52 (0.97-2.26)  | 0.97    |
|                                    |                      | Female      | 22  | 1.54 (0.97-2.33)  |         |

**Supplementary Table 4 - Standardised incident ratios of myeloid malignancies in first-degree relatives of individuals with myeloid malignancy, stratified by the sex of cases.** N, number; SIR, standardised incident ratio; CI, confidence interval. *P* value represents a trend test. Where a first-degree relative appears in both groups due to being related to two or more incident cases, the first-degree relative is counted in both groups. Myeloid malignancies comprise polycythemia vera, essential thrombocythemia, myelofibrosis, myeloproliferative neoplasm NOS, chronic myeloid leukemia, myelodysplastic syndrome, acute myeloid leukemia. Myeloproliferative neoplasms comprise polycythemia vera, essential thrombocythemia, myelofibrosis and myeloproliferative neoplasm NOS.

|                                    | Overall SIR (95% CI) | Sex of FDR | N   | SIR (95% CI)      | P value |
|------------------------------------|----------------------|------------|-----|-------------------|---------|
| <b>Myeloid malignancies</b>        | 1.99 (1.82-2.17)     | Male       | 243 | 1.95 (1.71-2.21)  | 0.52    |
|                                    |                      | Female     | 236 | 2.02 (1.77-2.29)  |         |
| <b>Myeloproliferative neoplasm</b> | 4.93 (4.26-5.70)     | Male       | 84  | 4.74 (3.78-5.87)  | 0.53    |
|                                    |                      | Female     | 97  | 5.11 (4.14-6.23)  |         |
| <b>Polycythemia vera</b>           | 7.66 (5.86-10.03)    | Male       | 28  | 7.92 (5.26-11.45) | 0.70    |
|                                    |                      | Female     | 25  | 7.40 (4.79-10.92) |         |
| <b>Essential thrombocythemia</b>   | 6.75 (4.44-10.25)    | Male       | 9   | 6.70 (3.06-12.72) | 0.98    |
|                                    |                      | Female     | 13  | 6.79 (3.62-11.61) |         |
| <b>Chronic myeloid leukemia</b>    | 0.78 (0.29-2.07)     | Male       | 1   | 0.34 (0.01-1.89)  | 0.19    |
|                                    |                      | Female     | 3   | 1.36 (0.28-3.97)  |         |
| <b>Myelodysplastic syndrome</b>    | 6.88 (4.33-10.92)    | Male       | 10  | 7.00 (3.36-12.87) | 0.94    |
|                                    |                      | Female     | 8   | 6.74 (2.91-13.28) |         |
| <b>Acute myeloid leukemia</b>      | 1.53 (1.15-2.04)     | Male       | 24  | 1.55 (0.99-2.31)  | 0.93    |
|                                    |                      | Female     | 22  | 1.51 (0.95-2.29)  |         |

**Supplementary Table 5 - Standardised incident ratios of myeloid malignancies in first-degree relatives of individuals with myeloid malignancy, stratified by the sex of first-degree relative.** FDR, first-degree relative; N, number; SIR, standardised incident ratio; CI, confidence interval. *P* value represents a trend test. Where a first-degree relative appears in both groups due to being related to two or more incident cases, the first-degree relative is counted in both groups. Myeloid malignancies comprise polycythemia vera, essential thrombocythemia, myelofibrosis, myeloproliferative neoplasm NOS, chronic myeloid leukemia, myelodysplastic syndrome, acute myeloid leukemia. Myeloproliferative neoplasms comprise polycythemia vera, essential thrombocythemia, myelofibrosis and myeloproliferative neoplasm NOS.

| Individual with hematological malignancy | N   | SIR (95% CI)     | Number of affected FDRs |    | SIR (95% CI)       | CR (%) | P value |
|------------------------------------------|-----|------------------|-------------------------|----|--------------------|--------|---------|
|                                          |     |                  | 1                       | ≥2 |                    |        |         |
| <b>Myeloid malignancies</b>              | 470 | 1.96 (1.79-2.15) | 1.4                     | 9  | 4.55 (2.08-8.64)   | 4.4    | 0.02    |
| <b>Myeloproliferative neoplasm</b>       | 176 | 4.83 (4.14-5.60) | 1.2                     | 5  | 17.82 (5.79-24.89) | 3.2    | 0.01    |

**Supplementary Table 6: Familial relative risks of myeloid and myeloproliferative neoplasm, by number of first-degree relatives affected.** FDR, first-degree relative; N, number; SIR, Standardised incidence ratios; CI, confidence interval; CR, cumulative risk. *P* value represents a trend test. Myeloid malignancies comprise polycythemia vera, essential thrombocythemia, myelofibrosis, myeloproliferative neoplasm NOS, chronic myeloid leukemia, myelodysplastic syndrome, acute myeloid leukemia. Myeloproliferative neoplasms comprise polycythemia vera, essential thrombocythemia, myelofibrosis and myeloproliferative neoplasm NOS.
